# Supplementary material
Source: publisher site journal article supplement (https://www.spandidos-publications.com/6031/downloadSupplementary)
Supplement: Supplementary file 1 [file downloadSupplementary]

## Sheet: classical_A485_down_BP
Supplementary Table VI: Top 100 GO terms of downregulated genes in classical cell lines (PaTu-S, Capan-1, Capan-2, Colo357) after 24h A485 (1µM) treatment compared to control-treated cell lines
No.	GO.ID	Term	Annotated	Significant	Expected	Rank in Fisher.classic	Fisher.elim	Fisher.classic	Venn diagram
1	GO:0032501	multicellular organismal process	1831	328	228.16	1	0.13295	6.2e-20	overlapping with basal-like
2	GO:0048856	anatomical structure development	1576	287	196.38	2	0.14385	2.9e-17	overlapping with basal-like
3	GO:1901615	organic hydroxy compound metabolic proce...	156	60	19.44	3	0.08396	3.1e-17	only in classical
4	GO:0032502	developmental process	1713	304	213.45	4	0.07753	6.7e-17	overlapping with basal-like
5	GO:0048731	system development	1290	240	160.74	5	0.46136	1.2e-14	overlapping with basal-like
6	GO:0006066	alcohol metabolic process	117	47	14.58	6	0.22162	1.5e-14	only in classical
7	GO:0051239	regulation of multicellular organismal p...	844	175	105.17	7	0.03751	1.6e-14	overlapping with basal-like
8	GO:0022610	biological adhesion	357	95	44.49	8	0.01315	2.4e-14	overlapping with basal-like
9	GO:0023052	signaling	1646	287	205.11	9	0.1046	2.7e-14	overlapping with basal-like
10	GO:0065008	regulation of biological quality	1087	210	135.45	10	0.63422	3.1e-14	only in classical
11	GO:0007155	cell adhesion	354	94	44.11	11	0.019	3.9e-14	overlapping with basal-like
12	GO:0008283	cell population proliferation	553	128	68.91	12	0.26451	4.4e-14	overlapping with basal-like
13	GO:0030155	regulation of cell adhesion	203	65	25.3	13	0.00087	5e-14	overlapping with basal-like
14	GO:0007275	multicellular organism development	1437	258	179.06	14	0.35775	5.7e-14	overlapping with basal-like
15	GO:0042127	regulation of cell population proliferat...	468	113	58.32	15	8.6e-05	9.5e-14	overlapping with basal-like
16	GO:0050896	response to stimulus	2339	372	291.46	16	0.49345	1.1e-13	overlapping with basal-like
17	GO:0009888	tissue development	561	128	69.91	17	0.00188	1.4e-13	overlapping with basal-like
18	GO:0007154	cell communication	1651	284	205.73	18	0.26982	3.3e-13	overlapping with basal-like
19	GO:0048513	animal organ development	932	184	116.14	19	0.18432	4e-13	overlapping with basal-like
20	GO:0048869	cellular developmental process	1115	210	138.94	20	0.06472	5.7e-13	overlapping with basal-like
21	GO:0030154	cell differentiation	1091	206	135.95	21	0.08924	8.6e-13	overlapping with basal-like
22	GO:0006629	lipid metabolic process	426	103	53.08	22	0.0768	1.4e-12	only in classical
23	GO:0003008	system process	397	98	49.47	23	0.04942	1.5e-12	only in classical
24	GO:0009653	anatomical structure morphogenesis	759	156	94.58	24	0.37141	1.9e-12	overlapping with basal-like
25	GO:0040011	locomotion	471	110	58.69	25	0.09038	2.4e-12	overlapping with basal-like
26	GO:0007165	signal transduction	1534	263	191.15	26	0.00691	1.2e-11	overlapping with basal-like
27	GO:0051240	positive regulation of multicellular org...	460	106	57.32	27	0.00144	1.6e-11	only in classical
28	GO:0006928	movement of cell or subcellular componen...	553	121	68.91	28	0.38319	1.8e-11	overlapping with basal-like
29	GO:0008202	steroid metabolic process	98	38	12.21	29	0.04221	2e-11	only in classical
30	GO:0051674	localization of cell	427	100	53.21	30	0.0148	2.6e-11	overlapping with basal-like
31	GO:0048870	cell motility	427	100	53.21	31	0.0148	2.6e-11	overlapping with basal-like
32	GO:0022603	regulation of anatomical structure morph...	346	86	43.11	32	0.00971	3e-11	overlapping with basal-like
33	GO:0051270	regulation of cellular component movemen...	285	75	35.51	33	0.01812	3.6e-11	overlapping with basal-like
34	GO:0046890	regulation of lipid biosynthetic process	63	29	7.85	34	0.0411	3.7e-11	only in classical
35	GO:0050793	regulation of developmental process	741	149	92.33	35	0.84844	4.7e-11	overlapping with basal-like
36	GO:0033993	response to lipid	249	68	31.03	36	1	5.5e-11	only in classical
37	GO:0019218	regulation of steroid metabolic process	39	22	4.86	37	0.07433	5.6e-11	only in classical
38	GO:0032879	regulation of localization	732	147	91.21	38	0.77653	7.4e-11	only in classical
39	GO:0030855	epithelial cell differentiation	193	57	24.05	39	0.00315	8.3e-11	overlapping with basal-like
40	GO:0050673	epithelial cell proliferation	108	39	13.46	40	0.00027	1.4e-10	overlapping with basal-like
41	GO:0016477	cell migration	403	94	50.22	41	0.03788	1.5e-10	overlapping with basal-like
42	GO:0042632	cholesterol homeostasis	28	18	3.49	42	1.6e-10	1.6e-10	only in classical
43	GO:0055092	sterol homeostasis	28	18	3.49	43	1	1.6e-10	only in classical
44	GO:0051094	positive regulation of developmental pro...	380	90	47.35	44	0.00038	1.6e-10	overlapping with basal-like
45	GO:0046903	secretion	459	103	57.2	45	0.20317	1.8e-10	only in classical
46	GO:0035295	tube development	317	79	39.5	46	0.3335	1.9e-10	overlapping with basal-like
47	GO:0060429	epithelium development	364	87	45.36	47	0.2455	2.1e-10	overlapping with basal-like
48	GO:2000145	regulation of cell motility	263	69	32.77	48	0.23631	2.8e-10	overlapping with basal-like
49	GO:0050810	regulation of steroid biosynthetic proce...	35	20	4.36	49	0.00394	3.1e-10	only in classical
50	GO:0040012	regulation of locomotion	271	70	33.77	50	0.49572	4.4e-10	overlapping with basal-like
51	GO:0042221	response to chemical	1217	214	151.65	51	0.33998	4.9e-10	only in classical
52	GO:0048878	chemical homeostasis	300	75	37.38	52	0.03009	5e-10	only in classical
53	GO:0019216	regulation of lipid metabolic process	131	43	16.32	53	0.01845	5.2e-10	only in classical
54	GO:0009605	response to external stimulus	719	142	89.59	54	0.51623	6.4e-10	only in classical
55	GO:0007166	cell surface receptor signaling pathway	802	154	99.94	55	0.00011	8.3e-10	overlapping with basal-like
56	GO:0030334	regulation of cell migration	248	65	30.9	56	0.00021	1e-09	overlapping with basal-like
57	GO:0098609	cell-cell adhesion	211	58	26.29	57	0.02307	1.3e-09	only in classical
58	GO:0051716	cellular response to stimulus	1968	311	245.23	58	0.95403	1.5e-09	overlapping with basal-like
59	GO:0008610	lipid biosynthetic process	234	62	29.16	59	0.20455	1.6e-09	only in classical
60	GO:0022407	regulation of cell-cell adhesion	108	37	13.46	60	0.01418	2.3e-09	only in classical
61	GO:0007586	digestion	35	19	4.36	61	0.00255	2.9e-09	only in classical
62	GO:0048646	anatomical structure formation involved ...	315	75	39.25	62	0.0102	5.5e-09	overlapping with basal-like
63	GO:0044281	small molecule metabolic process	604	121	75.26	63	0.3451	7.5e-09	only in classical
64	GO:0050678	regulation of epithelial cell proliferat...	89	32	11.09	64	0.01378	7.6e-09	only in classical
65	GO:0006694	steroid biosynthetic process	64	26	7.97	65	0.29942	1e-08	only in classical
66	GO:0010817	regulation of hormone levels	123	39	15.33	66	0.61366	1.1e-08	only in classical
67	GO:0015850	organic hydroxy compound transport	52	23	6.48	67	0.0019	1.1e-08	only in classical
68	GO:0048518	positive regulation of biological proces...	1748	279	217.82	68	0.32905	1.2e-08	overlapping with basal-like
69	GO:0055088	lipid homeostasis	41	20	5.11	69	0.48014	1.3e-08	only in classical
70	GO:0051241	negative regulation of multicellular org...	310	73	38.63	70	0.0107	1.5e-08	overlapping with basal-like
71	GO:0010876	lipid localization	106	35	13.21	71	0.04391	1.9e-08	only in classical
72	GO:1901700	response to oxygen-containing compound	471	99	58.69	72	0.09477	1.9e-08	only in classical
73	GO:0140352	export from cell	440	94	54.83	73	0.59682	2e-08	only in classical
74	GO:0044255	cellular lipid metabolic process	330	76	41.12	74	0.32245	2.1e-08	only in classical
75	GO:0022600	digestive system process	25	15	3.12	75	0.04373	2.2e-08	only in classical
76	GO:0048514	blood vessel morphogenesis	183	50	22.8	76	0.8054	2.4e-08	overlapping with basal-like
77	GO:0048732	gland development	122	38	15.2	77	0.09764	2.8e-08	only in classical
78	GO:0065007	biological regulation	3189	450	397.38	78	0.99291	3.4e-08	only in classical
79	GO:0006869	lipid transport	90	31	11.21	79	0.03893	4.2e-08	only in classical
80	GO:0035239	tube morphogenesis	259	63	32.27	80	0.58467	4.5e-08	overlapping with basal-like
81	GO:0001655	urogenital system development	114	36	14.21	81	0.00363	4.5e-08	only in classical
82	GO:1902652	secondary alcohol metabolic process	60	24	7.48	82	0.40308	5.6e-08	only in classical
83	GO:0042592	homeostatic process	519	105	64.67	83	0.68838	5.7e-08	only in classical
84	GO:0008203	cholesterol metabolic process	56	23	6.98	84	0.00221	5.9e-08	only in classical
85	GO:0070887	cellular response to chemical stimulus	947	168	118	85	0.01889	6e-08	only in classical
86	GO:0010033	response to organic substance	969	171	120.75	86	0.27935	6.4e-08	only in classical
87	GO:0001568	blood vessel development	211	54	26.29	87	0.54197	7.3e-08	overlapping with basal-like
88	GO:0051049	regulation of transport	464	96	57.82	88	0.57587	7.7e-08	only in classical
89	GO:0048871	multicellular organismal homeostasis	152	43	18.94	89	0.05287	8e-08	only in classical
90	GO:0023051	regulation of signaling	1029	179	128.22	90	0.18257	8.1e-08	overlapping with basal-like
91	GO:0072359	circulatory system development	316	72	39.38	91	0.54572	8.2e-08	overlapping with basal-like
92	GO:0016125	sterol metabolic process	61	24	7.6	92	0.47536	8.2e-08	only in classical
93	GO:0043269	regulation of ion transport	148	42	18.44	93	0.01588	1e-07	only in classical
94	GO:0048583	regulation of response to stimulus	1178	199	146.79	94	0.1116	1.1e-07	only in classical
95	GO:0051046	regulation of secretion	165	45	20.56	95	0.25851	1.3e-07	only in classical
96	GO:0061041	regulation of wound healing	42	19	5.23	96	0.03702	1.4e-07	only in classical
97	GO:0045785	positive regulation of cell adhesion	124	37	15.45	97	0.00046	1.5e-07	only in classical
98	GO:0006811	ion transport	402	85	50.09	98	0.16568	1.8e-07	only in classical
99	GO:0006720	isoprenoid metabolic process	43	19	5.36	99	0.08731	2.1e-07	only in classical
100	GO:0008285	negative regulation of cell population p...	202	51	25.17	100	4e-05	2.7e-07	only in classical

## Sheet: basal-like_A485_down_BP
Supplementary Table 6: Top 100 GO terms of downregulated genes in basal-like cell lines (PaTu-T, PANC-1, MIAPaCa-2) after 24h A485 (1µM) treatment compared to control-treated cell lines
no.	GO.ID	Term	Annotated	Significant	Expected	Rank in Fisher.classic	Fisher.elim	Fisher.classic	Venn diagram
1	GO:0048731	system development	342	73	35.2	1	0.10044	9e-15	overlapping with classical
2	GO:0007275	multicellular organism development	379	74	39	2	0.18009	1.2e-12	overlapping with classical
3	GO:0048856	anatomical structure development	411	77	42.3	3	0.27076	2.7e-12	overlapping with classical
4	GO:0048513	animal organ development	265	59	27.27	4	0.06879	7.1e-12	overlapping with classical
5	GO:0048869	cellular developmental process	286	61	29.43	5	0.01776	1.9e-11	overlapping with classical
6	GO:0032502	developmental process	445	79	45.8	6	0.34694	2.5e-11	overlapping with classical
7	GO:0032501	multicellular organismal process	475	82	48.88	7	0.32185	2.8e-11	overlapping with classical
8	GO:0009653	anatomical structure morphogenesis	210	50	21.61	8	0.22923	6.5e-11	overlapping with classical
9	GO:0030154	cell differentiation	279	59	28.71	9	0.04728	8.6e-11	overlapping with classical
10	GO:0016477	cell migration	125	36	12.86	10	0.04826	3.3e-10	overlapping with classical
11	GO:0048646	anatomical structure formation involved ...	97	31	9.98	11	0.03285	4.5e-10	overlapping with classical
12	GO:0009888	tissue development	141	38	14.51	12	0.30185	8.1e-10	overlapping with classical
13	GO:0040011	locomotion	142	38	14.61	13	0.04357	1e-09	overlapping with classical
14	GO:0051674	localization of cell	130	36	13.38	14	0.07769	1.2e-09	overlapping with classical
15	GO:0048870	cell motility	130	36	13.38	15	0.07769	1.2e-09	overlapping with classical
16	GO:0048468	cell development	144	38	14.82	16	0.01468	1.6e-09	only in basal-like
17	GO:0040012	regulation of locomotion	85	27	8.75	17	0.43405	9.4e-09	overlapping with classical
18	GO:0030334	regulation of cell migration	80	26	8.23	18	0.65964	1.1e-08	overlapping with classical
19	GO:0051093	negative regulation of developmental pro...	75	25	7.72	19	0.01936	1.2e-08	only in basal-like
20	GO:0048514	blood vessel morphogenesis	55	21	5.66	20	0.37222	1.4e-08	overlapping with classical
21	GO:0001944	vasculature development	66	23	6.79	21	0.31961	2e-08	only in basal-like
22	GO:2000145	regulation of cell motility	83	26	8.54	22	0.74057	2.6e-08	overlapping with classical
23	GO:0051270	regulation of cellular component movemen...	89	27	9.16	23	0.81653	2.9e-08	overlapping with classical
24	GO:0035239	tube morphogenesis	74	24	7.62	24	0.15678	4.7e-08	overlapping with classical
25	GO:0001568	blood vessel development	64	22	6.59	25	0.35693	5.7e-08	overlapping with classical
26	GO:0050793	regulation of developmental process	204	44	20.99	26	0.5972	5.8e-08	overlapping with classical
27	GO:0035295	tube development	86	26	8.85	27	0.09146	6.1e-08	overlapping with classical
28	GO:0006928	movement of cell or subcellular componen...	155	37	15.95	28	0.30725	6.3e-08	overlapping with classical
29	GO:0022603	regulation of anatomical structure morph...	98	28	10.09	29	0.0016	6.7e-08	overlapping with classical
30	GO:0051271	negative regulation of cellular componen...	32	15	3.29	30	0.001	8e-08	only in basal-like
31	GO:0007166	cell surface receptor signaling pathway	206	44	21.2	31	0.00021	8.1e-08	overlapping with classical
32	GO:2000026	regulation of multicellular organismal d...	151	36	15.54	32	0.11174	1.1e-07	only in basal-like
33	GO:0072359	circulatory system development	94	27	9.67	33	0.3199	1.1e-07	overlapping with classical
34	GO:0001525	angiogenesis	47	18	4.84	34	5.3e-05	1.7e-07	only in basal-like
35	GO:0040013	negative regulation of locomotion	30	14	3.09	35	1	2.4e-07	only in basal-like
36	GO:0023052	signaling	402	66	41.37	36	0.1963	5.4e-07	overlapping with classical
37	GO:0022008	neurogenesis	114	29	11.73	37	0.03068	6.3e-07	only in basal-like
38	GO:0048699	generation of neurons	108	28	11.11	38	0.03881	6.8e-07	only in basal-like
39	GO:0060429	epithelium development	84	24	8.64	39	0.00486	7.3e-07	overlapping with classical
40	GO:0007154	cell communication	407	66	41.89	40	0.23107	9.4e-07	overlapping with classical
41	GO:0007155	cell adhesion	98	26	10.09	41	0.09713	1.2e-06	overlapping with classical
42	GO:0051961	negative regulation of nervous system de...	21	11	2.16	42	0.02272	1.3e-06	only in basal-like
43	GO:0048666	neuron development	75	22	7.72	43	0.04024	1.4e-06	only in basal-like
44	GO:0022610	biological adhesion	99	26	10.19	44	0.10941	1.4e-06	overlapping with classical
45	GO:0051239	regulation of multicellular organismal p...	242	46	24.91	45	0.06642	1.7e-06	overlapping with classical
46	GO:0033002	muscle cell proliferation	18	10	1.85	46	0.04898	2e-06	only in basal-like
47	GO:0051241	negative regulation of multicellular org...	89	24	9.16	47	0.01586	2.4e-06	overlapping with classical
48	GO:0043062	extracellular structure organization	35	14	3.6	48	1	2.5e-06	only in basal-like
49	GO:0030198	extracellular matrix organization	35	14	3.6	49	0.00019	2.5e-06	only in basal-like
50	GO:0001933	negative regulation of protein phosphory...	40	15	4.12	50	0.00182	2.8e-06	only in basal-like
51	GO:0051094	positive regulation of developmental pro...	109	27	11.22	51	0.01381	3.1e-06	overlapping with classical
52	GO:0031345	negative regulation of cell projection o...	9	7	0.93	52	1	3.1e-06	only in basal-like
53	GO:0010977	negative regulation of neuron projection...	9	7	0.93	53	3.1e-06	3.1e-06	only in basal-like
54	GO:0003151	outflow tract morphogenesis	9	7	0.93	54	3.1e-06	3.1e-06	only in basal-like
55	GO:0050768	negative regulation of neurogenesis	19	10	1.96	55	0.06482	3.8e-06	only in basal-like
56	GO:0009887	animal organ morphogenesis	85	23	8.75	56	0.00466	3.8e-06	only in basal-like
57	GO:0042326	negative regulation of phosphorylation	41	15	4.22	57	1	4e-06	only in basal-like
58	GO:0007165	signal transduction	378	61	38.9	58	0.39884	5.2e-06	overlapping with classical
59	GO:0008283	cell population proliferation	153	33	15.75	59	0.21475	5.5e-06	overlapping with classical
60	GO:0048762	mesenchymal cell differentiation	16	9	1.65	60	1	5.9e-06	only in basal-like
61	GO:0003007	heart morphogenesis	24	11	2.47	61	0.08183	6.8e-06	only in basal-like
62	GO:0034330	cell junction organization	43	15	4.43	62	0.41635	8e-06	only in basal-like
63	GO:0045595	regulation of cell differentiation	135	30	13.89	63	0.74339	9e-06	only in basal-like
64	GO:0045936	negative regulation of phosphate metabol...	49	16	5.04	64	0.58452	1e-05	only in basal-like
65	GO:0010563	negative regulation of phosphorus metabo...	49	16	5.04	65	0.58452	1e-05	only in basal-like
66	GO:0030182	neuron differentiation	96	24	9.88	66	0.06214	1e-05	only in basal-like
67	GO:0007399	nervous system development	165	34	16.98	67	0.07006	1.2e-05	only in basal-like
68	GO:0008544	epidermis development	30	12	3.09	68	0.00204	1.4e-05	only in basal-like
69	GO:0001667	ameboidal-type cell migration	40	14	4.12	69	0.23932	1.6e-05	only in basal-like
70	GO:0030336	negative regulation of cell migration	26	11	2.68	70	0.00055	1.7e-05	only in basal-like
71	GO:0048660	regulation of smooth muscle cell prolife...	14	8	1.44	71	1	1.8e-05	only in basal-like
72	GO:0048659	smooth muscle cell proliferation	14	8	1.44	72	1	1.8e-05	only in basal-like
73	GO:0007369	gastrulation	14	8	1.44	73	0.26517	1.8e-05	only in basal-like
74	GO:0010646	regulation of cell communication	245	44	25.21	74	0.0193	1.8e-05	only in basal-like
75	GO:0023051	regulation of signaling	245	44	25.21	75	0.0193	1.8e-05	overlapping with classical
76	GO:0060284	regulation of cell development	74	20	7.62	76	0.00941	1.9e-05	only in basal-like
77	GO:0051716	cellular response to stimulus	494	72	50.84	77	0.33244	1.9e-05	overlapping with classical
78	GO:0043588	skin development	22	10	2.26	78	0.00395	2e-05	only in basal-like
79	GO:1990778	protein localization to cell periphery	22	10	2.26	79	0.02637	2e-05	only in basal-like
80	GO:0010721	negative regulation of cell development	22	10	2.26	80	0.12488	2e-05	only in basal-like
81	GO:0060485	mesenchyme development	22	10	2.26	81	0.59764	2e-05	only in basal-like
82	GO:0050673	epithelial cell proliferation	31	12	3.19	82	0.00377	2.1e-05	overlapping with classical
83	GO:0031175	neuron projection development	69	19	7.1	83	0.15467	2.3e-05	only in basal-like
84	GO:0001704	formation of primary germ layer	11	7	1.13	84	0.00125	2.4e-05	only in basal-like
85	GO:0050896	response to stimulus	577	80	59.38	85	0.67539	2.4e-05	overlapping with classical
86	GO:0007612	learning	8	6	0.82	86	0.00099	2.5e-05	only in basal-like
87	GO:0048522	positive regulation of cellular process	440	66	45.28	87	0.72663	2.5e-05	only in basal-like
88	GO:0009790	embryo development	88	22	9.06	88	0.30398	2.6e-05	only in basal-like
89	GO:2000146	negative regulation of cell motility	27	11	2.78	89	1	2.7e-05	only in basal-like
90	GO:0042127	regulation of cell population proliferat...	128	28	13.17	90	0.12746	2.7e-05	overlapping with classical
91	GO:0040017	positive regulation of locomotion	47	15	4.84	91	0.17928	2.8e-05	only in basal-like
92	GO:0030155	regulation of cell adhesion	64	18	6.59	92	0.3075	2.9e-05	overlapping with classical
93	GO:0010631	epithelial cell migration	32	12	3.29	93	0.1221	3.1e-05	only in basal-like
94	GO:0090130	tissue migration	32	12	3.29	94	0.1221	3.1e-05	only in basal-like
95	GO:0090132	epithelium migration	32	12	3.29	95	0.1221	3.1e-05	only in basal-like
96	GO:0030855	epithelial cell differentiation	48	15	4.94	96	0.03374	3.7e-05	overlapping with classical
97	GO:0007389	pattern specification process	28	11	2.88	97	0.33227	4.1e-05	only in basal-like
98	GO:0010632	regulation of epithelial cell migration	28	11	2.88	98	0.2124	4.1e-05	only in basal-like
99	GO:1901342	regulation of vasculature development	28	11	2.88	99	0.2124	4.1e-05	only in basal-like
100	GO:0048518	positive regulation of biological proces...	474	69	48.78	100	0.64711	4.1e-05	overlapping with classical
